# Supplementary material
Source: publisher site journal article supplement (https://www.degruyter.com/publication/journal_key/PAC/downloadAsset/PAC_License%20form%20Conference%20and%20Special%20Topic%20Papers.pdf)
Supplement: Supplementary file 1 [file PAC_License%20form%20Conference%20and%20Special%20Topic%20Papers.pdf]

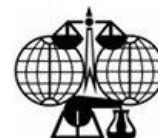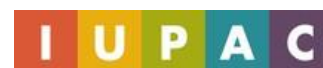INTERNATIONAL UNION OF PURE  
AND APPLIED CHEMISTRY

# PURE & APPLIED CHEMISTRY

## COPYRIGHT AGREEMENT: Technical Reports and Recommendations

1. The following agreement is valid under the condition that the article submitted be published by IUPAC and Walter de Gruyter, Inc. (the "Publisher"), in the journal **Pure and Applied Chemistry** (referred to as the "Journal") concerning the submission, in whole or in part, including any illustrations, charts, diagrams, maps, outlines, tables, etc. belonging to and having been submitted with the article

---

(in total referred to as the "Article").

21. The Author/Editor grants (for U.S. or U.K. government employees: to the extent transferable according to applicable law or regulations) to the Publisher the following rights to the Article, including any supplemental material, and any parts, extracts or elements thereof:
  - the right to reproduce and distribute the Article in printed form, including print-on-demand;
  - the right to produce prepublications, reprints, and special editions of the Article;
  - the right to translate the Article into other languages; the right to reproduce the Article using photomechanical or similar means including, but not limited to, photocopy, and the right to distribute these reproductions;
  - the right to reproduce and distribute the Article electronically or optically on any and all data carriers or storage media—especially in machine readable/digitalized form on data carriers such as hard drive, CD-Rom, DVD, Blu-ray Disc (BD), Mini-Disk, data tape—and the right to reproduce and distribute the Article via these data carriers;
  - the right to store the Article in databases, including online databases, and the right of transmission of the Article in all technical systems and modes;
  - the right to make the Article available to the public or to closed user groups on individual demand, for use on monitors or other readers (including e-books), and in printable form for the user, either via the internet, other online services, or via internal or external networks.
22. The rights pursuant to clause 2.1 shall be granted as exclusive rights for the duration of the copyright, each unlimited in geographic scope. The Article will be published in the Journal under a Creative Commons CC BY-NC-ND license, allowing for the free distribution of the Version of Record also called the Publisher .pdf version of the Article in unadapted form only, provided this distribution is non-commercial in nature and that attribution to the Author and to the journal is included. Should the Author wish to reproduce and distribute the Article commercially, the Author must obtain the written consent of the Publisher. Taking into account the interests on both sides, the Publisher shall not unreasonably withhold its consent. If the Article is submitted by the Editor, the Editor shall inform the Author(s) of this provision.
23. The Publisher may transfer the rights granted to it pursuant to clauses 2.1 and 2.2 in whole or in part to third parties, or may grant licenses to third parties to use rights to which it is entitled. Any claims from agreements between the Author and reprographic rights societies, in particular the German VG Wort, to which the Author is entitled shall remain unaffected.
24. The Author/Editor furthermore grants the Publisher the exclusive and permanent rights without any restriction as to content and territory for all forms of media of expression now known or that will be developed in the future. The grant of rights shall also extend to the exploitation of rights of use both in the Publisher's own publishing company and through the grant (including a partial grant) of rights to third parties in exchange for remuneration or free of charge.
3. Obligations of the Author/Editor: The Author/Editor warrants that a) Author is the Author of the Article or, if Editor, Editor has properly and irrevocably acquired without restriction any and all rights in and to the Article to the extent as stated in clause 2.1.; b) Author/Editor is entitled without restriction to grant such rights to the Publisher; c) the Article is not libelous and does not infringe on any copyrights, performing rights, trademark rights, personal rights or any other third party rights or is otherwise unlawful; and d) the Article or substantial parts thereof have not been published elsewhere. The Author will indemnify the Publisher against any costs, expenses, or damages, including reasonable

attorneys' fees, which the Publisher may incur or for which the Publisher may become liable as a result of a breach of the warranties in clause 3 a-d. These representations and warranties will survive the termination of this Agreement and may be extended to third parties by the Publisher.

4. **Retention of Rights:** The Author/Editor may deposit the Version of Record, also called the Publisher's .pdf version of the Article on Author's/Editor's institutional or funder's designated non-commercial repository at the funder's request or as a result of a legal obligation. The Author/Editor may only post the Article provided it is unadapted and acknowledgement is given to the original source of publication. The Author/Editor is requested to use the appropriate DOI for the Article. **Backup Copy:** The Author/Editor shall be obliged to retain a back-up copy of the manuscript (data file and print out or PDF, as well as copy for illustrations).
5. **Reversion of Rights:** All rights pursuant to clauses 2 to 4 shall revert to the Author should the Article be rejected during the publication process.
6. **Proofreading:** Upon receiving the typeset proofs, the Author/Editor agrees to promptly check the proofs carefully, correct any typographical errors, and authorize the publication of the corrected proofs.

Place/Date: \_\_\_\_\_ Signature: \_\_\_\_\_

Name: \_\_\_\_\_  
(PRINT IN BLOCK CAPITALS)
